# Supplementary material for: OVEX1, a novel chicken endogenous retrovirus with sex-specific and left-right asymmetrical expression in gonads
Source: Springer Nature journal article supplement (doi:10.1186/1742-4690-6-59), 2009-06-17
Supplement: Additional file 9 [file 1742-4690-6-59-s9.pdf]

**Table S1. Primers and PCR conditions**

| Product                                                               | Forward primer <sup>a</sup> | Sequence <sup>b</sup>                    | Reverse primer <sup>a</sup> | Sequence <sup>b</sup>    | PCR conditions |
|-----------------------------------------------------------------------|-----------------------------|------------------------------------------|-----------------------------|--------------------------|----------------|
| <b>RT-PCR fragment amplification</b>                                  |                             |                                          |                             |                          |                |
| Fragment A                                                            | Ov31s                       | CCAGCAGAGCTCTGCAGCATCCATCC               | Ov1171a                     | GGCTGACTGGCTCATCAGG      | 57° 30 cycles  |
| Fragment B                                                            | Ov480s                      | ACTGTGTCAGCAGTGGGAGA                     | Ov3245a                     | GACACCTCTTTCCAGCACAG     |                |
| Fragment C                                                            | Ov2511s                     | TCCTGAGCTCCTCATCCATC                     | Ov5053a                     | ACCGTGAGAAGACATGCTCTA    |                |
| Fragment D                                                            | Ov4303s                     | AAACTGCAGTACCTCGCCAAG                    | Ov6849a                     | GGACGCAGGACAGCAATGATGGGA |                |
| Fragment E                                                            | Ov5602s                     | TGGATGGGACCCGTTAGGGTTGTG                 | Ov7840a                     | GCACACACCCCTTCCCTACGT    |                |
| Fragment F                                                            | Ov7594s                     | CACAAATGGGTCTGTGGTCT                     | Ov8904a                     | CACGTCTCCTGGCTTTCCCT     |                |
| <b>Race PCR</b>                                                       |                             |                                          |                             |                          |                |
| 5' RACE                                                               |                             |                                          | Ov6849a                     | GGACGCAGGACAGCAATGATGGGA |                |
| 5' RACE                                                               |                             |                                          | Ov6061a                     | TACATGAGCTTGAGACCAAGGCCA |                |
| 5' RACE                                                               |                             |                                          | Ov654a                      | GAGCTCACCTTGGCCTGCTCCAGA |                |
| 3' RACE                                                               | Ov8378s                     | GCCAAGCGCCTCCTACCATAGTCA                 |                             |                          |                |
| <b>Amplification of Gag and Pol DNA fragments from domestic birds</b> |                             |                                          |                             |                          |                |
| Gag                                                                   | Ov480s                      | ACTGTGTCAGCAGTGGGAGA                     | Ov654a                      | GAGCTCACCTTGGCCTGCTCCAGA | 57° 30 cycles  |
|                                                                       |                             |                                          | Ov656a                      | TTGAGCTCACCTTGGCCTGCTC   | 59° 30 cycles  |
| Pol                                                                   | Ov2647s                     | CCTCTCAGCAGCAGCCTCAATA                   | Ov3092a                     | TTGTGGCTGAGCTTCTCCACAT   | 60° 30 cycles  |
| <b>Expression</b>                                                     |                             |                                          |                             |                          |                |
| Unspliced                                                             | Ov31s                       | CCAGCAGAGCTCTGCAGCATCCATCC               | Ov654a                      | GAGCTCACCTTGGCCTGCTCCAGA | 57° 27 cycles  |
| Spliced                                                               | Episs                       | <u>CGTCCGGACGAGGATTGATG</u> <sup>c</sup> | Ov6369a                     | ACAAAGACTGGCTGGACTAATG   | 57° 29 cycles  |
| GAPDH                                                                 | GAPDHs                      | CACTATAAAGGCGAGATG                       | GAPDHs                      | GGCTGTGTGCTGGCTCA        | 57° 26 cycles  |
| <b>Internal polyadenylation site efficiency</b>                       |                             |                                          |                             |                          |                |
|                                                                       | Ov5602s                     | TGGATGGGACCCGTTAGGGTTGTG                 | Ov6018a                     | TACCGCCTGACCCTGTGCTG     | 57° 30 cycles  |
|                                                                       |                             |                                          | Ov6061a                     | TACATGAGCTTGAGACCAAGGCCA |                |
|                                                                       | Episs                       | <u>CGTCCGGACGAGGATTGATG</u> <sup>c</sup> | Ov6369a                     | ACAAAGACTGGCTGGACTAATG   |                |
|                                                                       |                             |                                          | Ov6849a                     | GGACGCAGGACAGCAATGATGGGA |                |

<sup>a</sup> Forward (s) and reverse primers (a) are named according to the position of their 5'-end in the DNA sequence given in Figs. 2 and 3.

<sup>b</sup> Sequences are written in the 5' to 3' direction

<sup>c</sup> Exon 1 is underlined and exon 2 doubly underlined.
